# Supplementary material for: EAU Biochemical Recurrence Risk Classification and PSA Kinetics Have No Value for Patient Selection in PSMA-Radioguided Surgery (PSMA-RGS) for Oligorecurrent Prostate Cancer
Source: MDPI journal article supplement (doi:10.3390/cancers15205008), 2023-10-16
Supplement: s1 [file s1]

## **Supplementary Material**

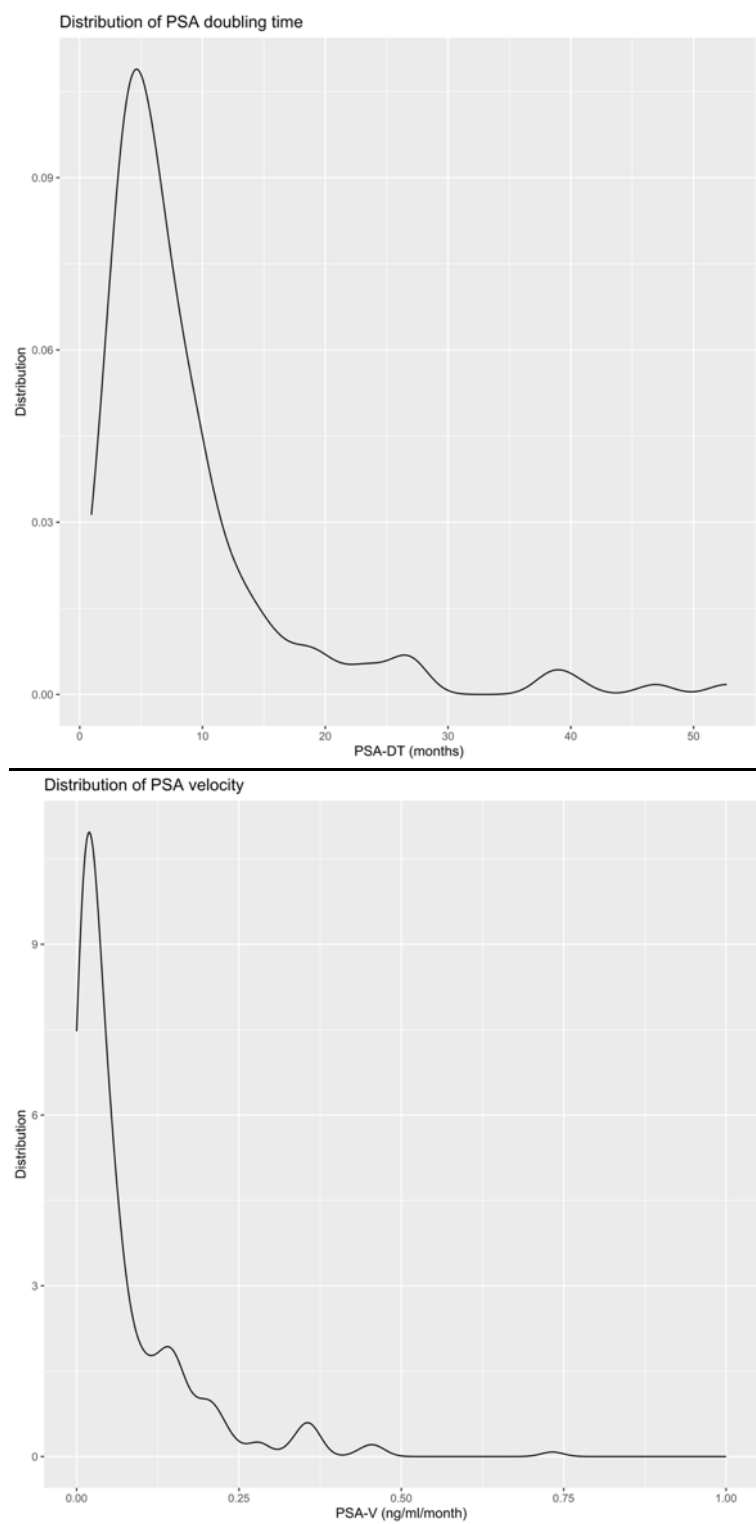

**Figure S1.** Distribution of PSA-DT and PSA-V within the cohort as density function.
